# Supplementary material for: Ameliorative effect of Ascorbic acid and biochar on Growth, and antioxidant enzymes on early Seedling of Sorghum under Salinity Conditions
Source: Research Square preprint supplement (doi:10.21203/rs.3.rs-136040/v1), 2021-01-11
Supplement: Supplementary file 1 [file 9d52891bfdcad5f5bd7eaf0e.docx]

**Title page**

**Ameliorative effect of Ascorbic acid and biochar on Growth, and antioxidant enzymes on early Seedling of Sorghum under Salinity Conditions**

**Aboagla Mohammed Ibrahim Elsiddig1, Guisheng Zhou**1 ***, Nimir Eltyb Ahmed Nimir 1,2**

**Authors affiliation**

Aboagla Mohammed Ibrahim Elsiddig and Guisheng Zhou. Joint International Research Laboratory of Agriculture and Agri-Product Safety of the Ministry of Education of China, Yangzhou University, Yangzhou 225009, China. Email: [aboaglagrisoo@gmail.com](mailto:aboaglagrisoo@gmail.com) and Email: [gszhou@yzu.edu.cn](mailto:gszhou@yzu.edu.cn).

(1) Nimir Eltyb Ahmed Nimir Faculty of Agriculture, University of Khartoum, 11115 Khartoum, Sudan. Email: [nimir1000@gmail.com](mailto:nimir1000@gmail.com).

* Correspondence: [gszhou@yzu.edu.cn](mailto:gszhou@yzu.edu.cn); Tel.: 86-514-87973290; 13338858866 (cell phone).

**Appendix section**

**Table 1.** Basic properties of the studied soil and biochar

| **Potting media** | **Electrical conductivity**  **(dS m−1)** | **pH** | **Organic matter**  **(g kg−1)** | **Total N**  **(g kg−1)** | **Total P**  **(g kg−1)** | **Total K**  **(g kg−1)** | **CEC**  **(cmol kg−1)** |
| --- | --- | --- | --- | --- | --- | --- | --- |
| Soil | 0.26 | 7.8 | 1.2 | 1.0 | 14.1 | 0.8 | 16.9 |
| Biochar | 120.6 | 9.9 | 398.4 | 7.43 | 10.7 | 13.6 | 120.6 |

aCEC, cation exchange capacity; EC, electrical conductivity of soil/water extracts (1:1)
